# Supplementary material
Source: publisher figshare collection journal article supplement (https://sage.figshare.com/ndownloader/files/16798871)
Supplement: Supplementary file 1 [file 16798871]

Table A1. Search strategy

| **Database** | **Search terms** |
| --- | --- |
| PubMed | (((nursing home [mesh]) AND (resident[tiab] or residents[tiab])) OR (("nursing home" [tiab] OR "nursing homes" [tiab] OR "nursing facility"[tiab] OR "nursing facilities" [tiab]) AND (resident[tiab] OR residents[tiab])) OR (("long‐term care facility"[tiab] OR "long‐term care facilities"[tiab]) AND (resident[tiab] OR residents[tiab])) OR "home for the aged"[tiab] OR "homes for the aged"[tiab] OR "institutional* care"[tiab]) AND (Hospitalization [mesh] OR (hospitalis* [tiab] OR hospitaliz*[tiab]) OR ((hospital[tiab] OR hospitals[tiab]) AND (admit*[tiab] or admis*[tiab]or transfer[tiab])) OR (hospital[tiab] AND (treat*[tiab] OR stay[tiab] OR days[tiab] OR care[tiab]))) AND (“terminal care”[mesh] OR “hospital mortality”[mesh] OR “palliative care”[mesh] OR “end of life” OR (death or die or died or dying)) |
| CINAHL | ((((MH "Nursing Homes+") AND (resident OR residents)) OR ((nursing N1 (home* OR facilit*)) AND (resident OR residents)) OR ("long- term care facilit*" AND (resident OR residents)) OR "home* for the aged" OR "institutional* care") AND ((MH "Hospitalization+") OR (hospitalis* OR hospitaliz*) OR (hospital N3 (treat* OR stay OR days OR care)) OR (hospital* N3 (admit* OR admis* OR transfer)))) AND (((MH "Terminal Care+")) OR ((MH "Hospital Mortality")) OR ((MH "Palliative Care")) OR ("end of life") OR (death OR die OR died OR dying)) |
| Scopus | ( ( ( ( TITLE-ABS-KEY ( "nursing home"  OR  "nursing facility"  OR  "long-term care facility" )  AND  TITLE-ABS ( resident ) )  OR  ( TITLE-ABS-KEY ( "home for the aged" ) ) )  AND  ( ( TITLE-ABS-KEY ( hospitaliz*  OR  hospitalis* ) )  OR  ( TITLE-ABS ( hospital  W/3  admit* ) )  OR  ( TITLE-ABS ( hospital  W/3  admis* ) )  OR  ( TITLE-ABS ( hospital  W/3  transfer ) )  OR  ( TITLE-ABS ( hospital  W/3  treat* ) )  OR  ( TITLE-ABS ( hospital  W/3  stay ) )  OR  ( TITLE-ABS ( hospital  W/3  days ) )  OR  ( TITLE-ABS ( hospital  W/3  care ) ) ) )  AND  ( ( "end-of-life" )  OR  ( death  OR  die  OR  died  OR  dying ) ) ) |
